# Supplementary material for: Measurement report: The variation properties of aerosol hygroscopic growth related to chemical composition during new particle formation days in a coastal city of southeast China
Source: Copernicus journal article supplement (doi:10.5194/egusphere-2024-2376), 2024-09-18
Supplement: Supplementary file 1 [file egusphere-2024-2376-supplement.pdf]

1 *Supplementary materials for*

2 **Measurement report: The variation properties of aerosol hygroscopic**  
3 **growth related to chemical composition during new particle formation**  
4 **events in a coastal city of southeast China**

5

6 Lingjun Li<sup>1,2,3</sup>, Mengren Li<sup>1,2,3\*</sup>, Xiaolong Fan<sup>1,2,3</sup>, Yuping Chen<sup>1,2,3</sup>, Ziyi Lin<sup>1,2,3</sup>, Anqi  
7 Hou<sup>1,2</sup>, Siqing Zhang<sup>1,2,3</sup>, Ronghua Zheng<sup>1,2,3</sup>, Jinsheng Chen<sup>1,2,3\*</sup>

8

9 <sup>1</sup> CAS Center for Excellence in Regional Atmospheric Environment, Institute of Urban Environment,  
10 Chinese Academy of Sciences, Xiamen 361021, China;

11 <sup>2</sup> Fujian Key Laboratory of Atmospheric Ozone Pollution Prevention, Institute of Urban Environment,  
12 Chinese Academy of Sciences, Xiamen 361021, China;

13 <sup>3</sup> College of Resources and Environment, University of Chinese Academy of Sciences, Beijing 100086,  
14 China

15

16 \* Corresponding to: Jinsheng Chen (jschen@iue.ac.cn) and Mengren Li (mrli@iue.ac.cn)

17

18

19

20

21

22

23

24

25

26

27

28

29

30

31

32

33

34

35

36

37

38

39

40

41 **Table S1.** The hygroscopicity parameters ( $\kappa$ ) and densities ( $\rho$ ) of inorganic salts used  
 42 in this study.

| Species                      | NH <sub>4</sub> NO <sub>3</sub> | (NH <sub>4</sub> ) <sub>2</sub> SO <sub>4</sub> | NH <sub>4</sub> HSO <sub>4</sub> | NH <sub>4</sub> Cl |
|------------------------------|---------------------------------|-------------------------------------------------|----------------------------------|--------------------|
| $\kappa$                     | 0.58                            | 0.48                                            | 0.56                             | 0.93               |
| $\rho$ (g cm <sup>-3</sup> ) | 1.72                            | 1.769                                           | 1.78                             | 1.527              |

43  
 44  
 45  
 46  
 47  
 48  
 49  
 50  
 51

**Table S2.** Comparisons of the average  $f(80\%)$  or  $f(85\%)$  values in different study.

| Study area            | Periods               | $f(\text{RH})$ | RH(%) | Reference               |
|-----------------------|-----------------------|----------------|-------|-------------------------|
| Lin'an, China         | 2013/3/1-31           | 1.43 ± 0.12    | 80    | Zhang et al.<br>(2015)  |
|                       |                       | 1.58 ± 0.12    | 85    |                         |
| Raoyang, China        | 2014/6/17 - 8/16      | 2.28 ± 0.69    | 80    | Wu et al.<br>(2017)     |
|                       |                       | 3.39 ± 1.14    | 85    |                         |
| Beijing, China        | 2017/1/12 – 2/14      | 1.47 ± 0.16    | 80    | Zhao et al.<br>(2019)   |
| Beijing, China        | 2019/9/19 - 10/4      | 1.64 ± 0.13    | 85    | Ren et al.<br>(2021)    |
| Guangzhou, China      | 2019/10/15 - 2020/1/8 | 1.50 ± 0.11    | 70    | Li et al. (2021)        |
| Ny- Ålesund, Svalbard | 2008/7/15 – 10/13     | 3.24 ± 0.63    | 85    | Zieger et al.<br>(2010) |
| Jungfrauoch, Swiss    | 2008/5                | 2.30 ± 0.33    | 85    | Zieger et al.<br>(2013) |
| Mace Head, Ireland    | 2009/1-2              | 2.08 ± 0.29    | 85    |                         |
| Granada, Spain        | 2013/4/4 – 5/10       | 1.60 ± 0.30    | 85    | Titos et al.<br>(2014)  |
| Xiamen, China         | 2022/2 - 4            | 1.44 ± 0.15    | 80    | This study              |
|                       |                       | 1.60 ± 0.16    | 85    |                         |

52  
 53  
 54  
 55  
 56  
 57  
 58  
 59  
 60  
 61

62 **Table S3.** Statistical analysis of particle concentration distribution ( $\text{cm}^{-3}$ ) for different  
 63 days from February to April 2022.

|                   |        | NPF                | Undefined          | Non-NPF            | Entire campaign    |
|-------------------|--------|--------------------|--------------------|--------------------|--------------------|
| Total             | mean   | $6.31 \times 10^3$ | $5.72 \times 10^3$ | $3.41 \times 10^3$ | $5.29 \times 10^3$ |
|                   | stdv   | $3.60 \times 10^3$ | $2.61 \times 10^3$ | $1.91 \times 10^3$ | $2.82 \times 10^3$ |
|                   | max    | $1.67 \times 10^4$ | $3.05 \times 10^4$ | $1.15 \times 10^4$ | $3.05 \times 10^4$ |
|                   | median | $5.60 \times 10^3$ | $5.37 \times 10^3$ | $2.82 \times 10^3$ | $4.91 \times 10^3$ |
|                   | min    | $1.08 \times 10^3$ | $6.57 \times 10^2$ | $5.50 \times 10^2$ | $5.50 \times 10^2$ |
| Nucleation mode   | mean   | $1.66 \times 10^3$ | $1.15 \times 10^3$ | $6.99 \times 10^2$ | $1.12 \times 10^3$ |
|                   | stdv   | $1.59 \times 10^3$ | $8.25 \times 10^2$ | $5.16 \times 10^2$ | $9.52 \times 10^2$ |
|                   | max    | $8.34 \times 10^3$ | $8.57 \times 10^3$ | $5.28 \times 10^3$ | $8.57 \times 10^3$ |
|                   | median | $1.06 \times 10^3$ | $9.40 \times 10^2$ | $5.81 \times 10^2$ | $8.64 \times 10^2$ |
|                   | min    | $1.05 \times 10^2$ | $6.59 \times 10$   | $2.00 \times 10$   | $2.00 \times 10$   |
| Aitken mode       | mean   | $3.80 \times 10^3$ | $3.37 \times 10^3$ | $1.78 \times 10^3$ | $3.08 \times 10^3$ |
|                   | stdv   | $2.80 \times 10^3$ | $1.82 \times 10^3$ | $1.08 \times 10^3$ | $1.98 \times 10^3$ |
|                   | max    | $1.44 \times 10^4$ | $2.21 \times 10^4$ | $6.09 \times 10^3$ | $2.21 \times 10^4$ |
|                   | median | $2.97 \times 10^3$ | $3.10 \times 10^3$ | $1.43 \times 10^3$ | $2.73 \times 10^3$ |
|                   | min    | $5.47 \times 10^2$ | $3.02 \times 10^2$ | $2.60 \times 10^2$ | $2.60 \times 10^2$ |
| Accumulation mode | mean   | $8.59 \times 10^2$ | $1.20 \times 10^3$ | $9.33 \times 10^2$ | $1.10 \times 10^3$ |
|                   | stdv   | $4.04 \times 10^2$ | $6.12 \times 10^2$ | $6.20 \times 10^2$ | $6.08 \times 10^2$ |
|                   | max    | $2.42 \times 10^3$ | $7.67 \times 10^3$ | $4.99 \times 10^3$ | $7.67 \times 10^3$ |
|                   | median | $7.82 \times 10^2$ | $1.11 \times 10^3$ | $7.55 \times 10^2$ | $1.01 \times 10^3$ |
|                   | min    | $2.09 \times 10^2$ | $3.73 \times 10$   | $8.75 \times 10$   | $3.73 \times 10$   |

64  
 65  
 66  
 67  
 68  
 69  
 70  
 71  
 72  
 73  
 74  
 75  
 76

77 **Table S4.** The curve-fitting parameters for  $f(\text{RH})$  for different aerosol types using  
 78 Eq.(1).

|                  |                      | $a$   | $b$   | Reference             |                       |
|------------------|----------------------|-------|-------|-----------------------|-----------------------|
| Entire campaign  | RH < 60%             | 1.02  | 0.21  | Chen et al.<br>(2014) |                       |
|                  | RH $\geq$ 60%        | 1.08  | 0.26  |                       |                       |
| Clean            | RH < 60%             | 1.00  | 0.10  |                       |                       |
|                  | RH $\geq$ 60%        | 1.00  | 0.26  |                       |                       |
| Polluted         | RH < 60%             | 1.03  | 0.26  |                       |                       |
|                  | RH $\geq$ 60%        | 1.14  | 0.25  |                       |                       |
| Very clean       |                      | 0.930 | 0.329 |                       | Zhao et al.<br>(2019) |
| Moderately clean | 12 Jan.-14 Feb. 2017 | 0.971 | 0.372 |                       |                       |
| Polluted         |                      | 0.988 | 0.356 |                       |                       |
| Very clean       |                      | 0.972 | 0.355 |                       |                       |
| Moderately clean | 6 July-21 Aug. 2017  | 0.980 | 0.362 |                       |                       |
| Polluted         |                      | 0.984 | 0.371 |                       |                       |
| Very clean       |                      | 0.979 | 0.334 |                       |                       |
| Moderately clean | 30 Sep.-13 Nov. 2017 | 1.002 | 0.344 |                       |                       |
| Polluted         |                      | 1.014 | 0.332 |                       |                       |
| NPF              | Feb.-Apr. 2022       | 0.993 | 0.257 | This work             |                       |
| Non-NPF          |                      | 1.026 | 0.289 |                       |                       |

79

80

81

82

83

84 **Table S5.** Statistics on the mass concentration ( $\mu\text{g m}^{-3}$ ) of aerosol species (S.D.:  
 85 standard deviation)

|          | Mean | S.D. | Maximum | Minimum |
|----------|------|------|---------|---------|
| Sulfate  | 1.82 | 1.08 | 6.54    | 0.02    |
| Nitrate  | 2.75 | 3.28 | 24.46   | 0.03    |
| Ammonium | 1.26 | 1.04 | 6.26    | 0.02    |
| Chlorine | 0.16 | 0.17 | 1.89    | 0.001   |
| OM       | 4.84 | 3.85 | 52.22   | 0.18    |
| BC       | 0.95 | 0.62 | 3.51    | 0.10    |

86

87

88

89

90

91

92

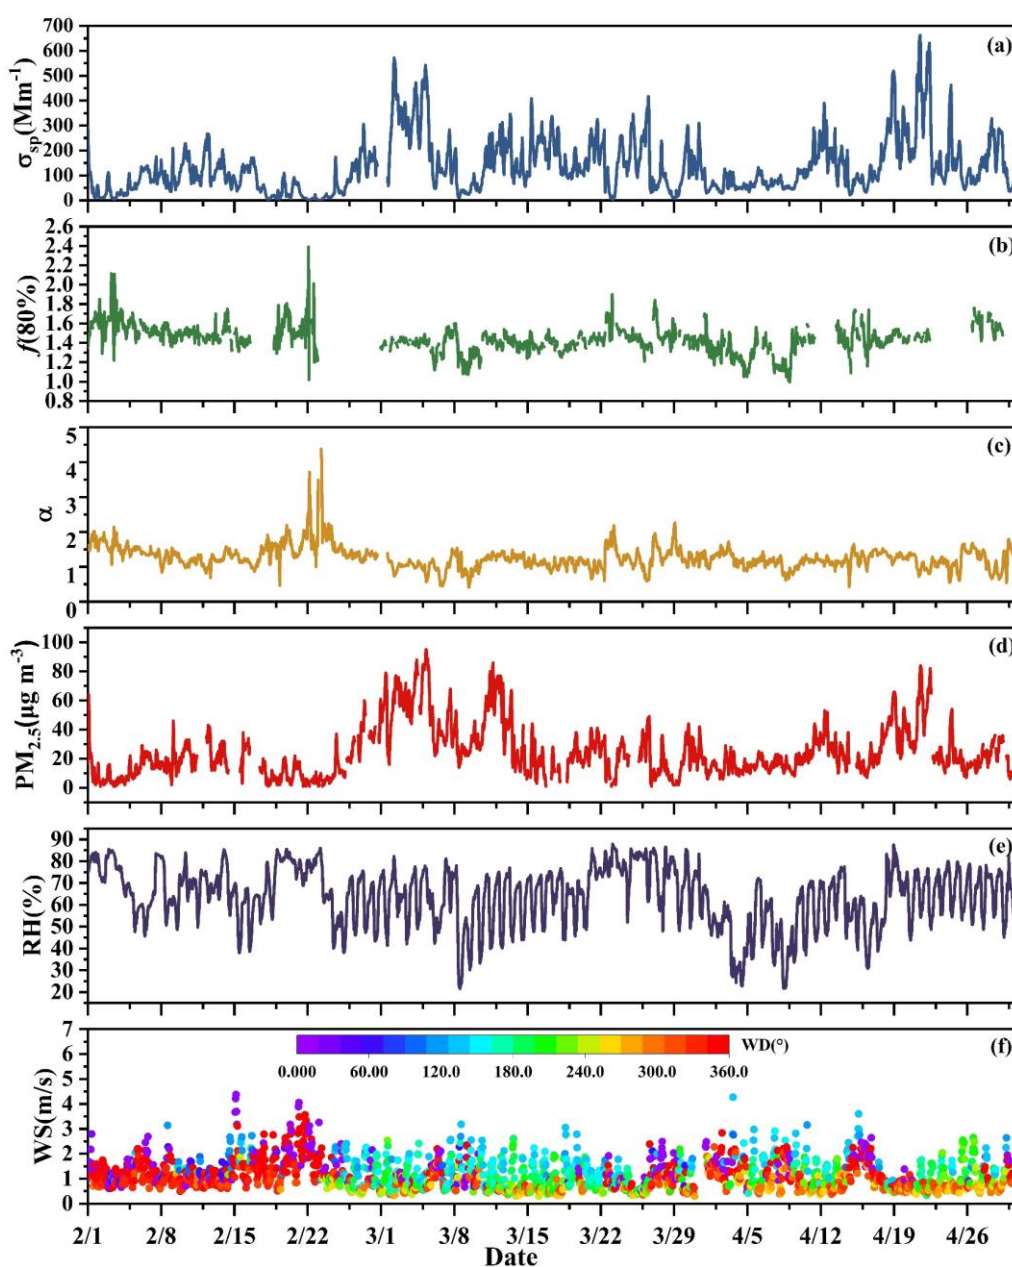

94 **Figure S1. Time series of measured and derived aerosol variables and ambient RH,**  
 95 **wind speed and direction from February to April 2022.** (a) Aerosol scattering  
 96 coefficient of DryNeph at 525 nm wavelength; (b) the aerosol scattering hygroscopic  
 97 growth factor  $f(80\%)$  at 525 nm wavelength; (c) scattering Ångström exponents  $\alpha$ ; (d)  
 98  $PM_{2.5}$  mass concentrations; (e) relative humidity (RH) at ambient conditions; (f) wind  
 99 speed (WS) and wind direction (WD).  
 100  
 101

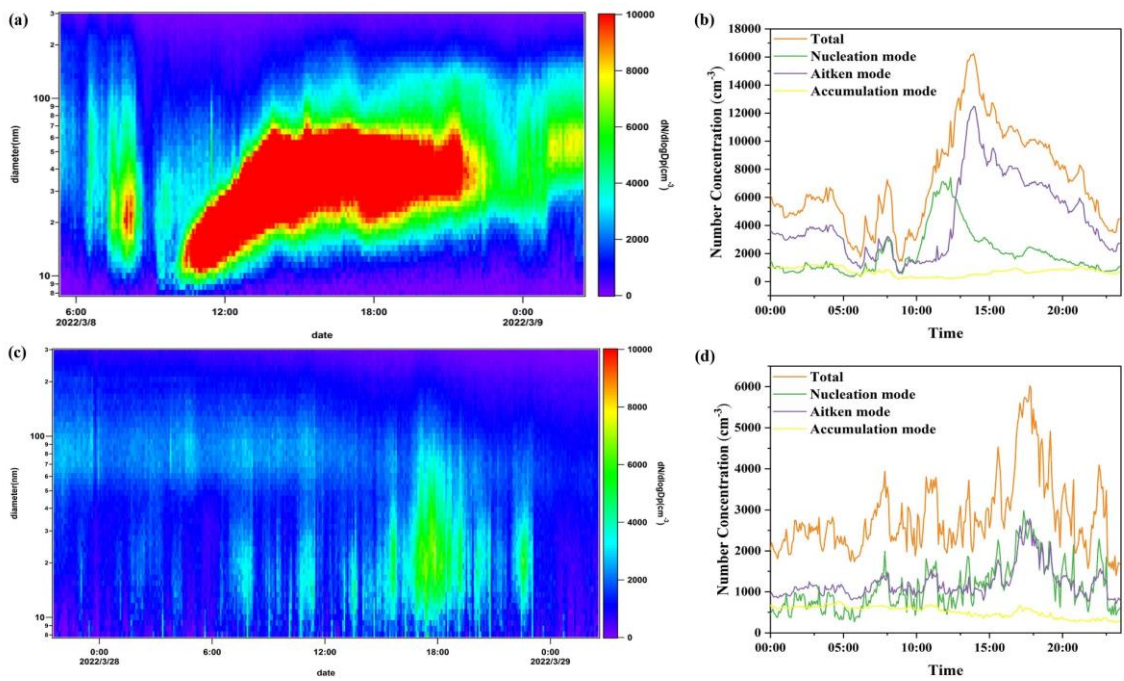

103 **Figure S2. the particle number size distribution spectrum and number**  
 104 **concentration.** Example of NPF (a, b) and Non-NPF (c, d) days.

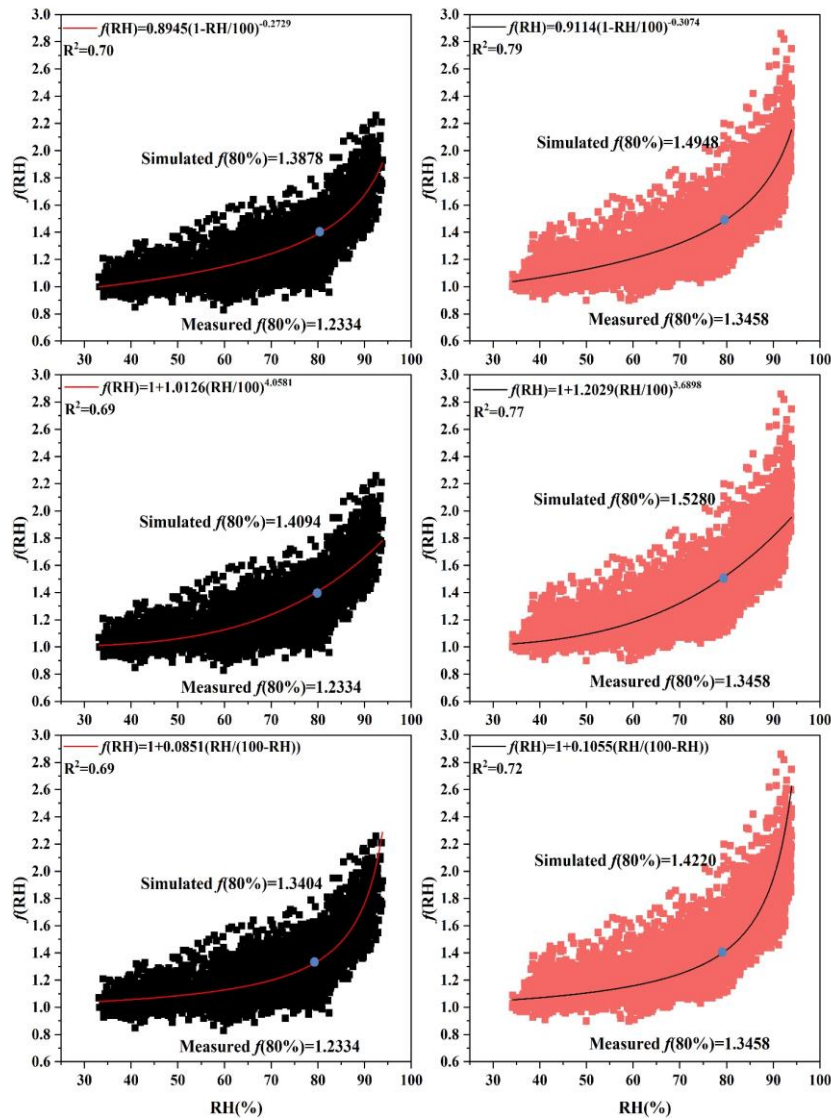

107 **Figure S3. Comparisons of the  $f(\text{RH})$  fitted curves following the other three**  
 108 **parameterization schemes between NPF and Non-NPF events. Black: NPF, red:**  
 109 **Non-NPF. The first column shows the results fitted by Eq. (S4), the second column**  
 110 **shows the results fitted by Eq. (S5), and the third column shows the results fitted by Eq.**  
 111 **(S6).**

112

113

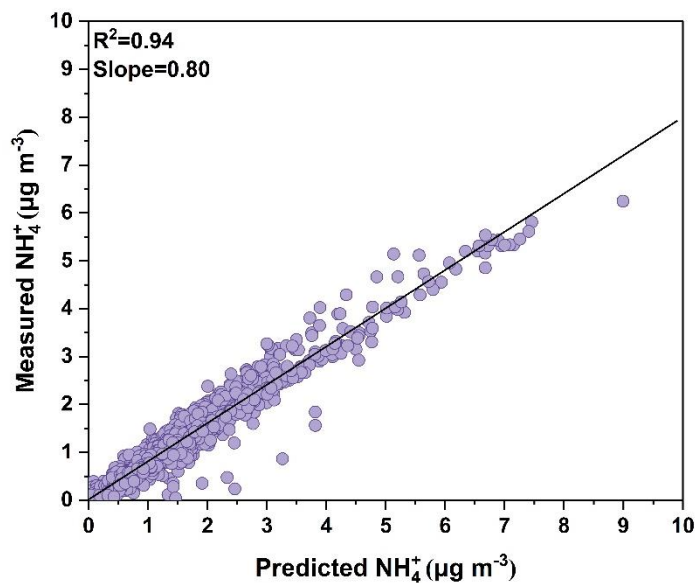

114 **Figure S4. Measured and predicted mass concentration of ammonium.** The  
115 predicted mass concentration of ammonium (predicted  $\text{NH}_4^+$ ) is calculated by Eq. (S5).  
116 The solid line represents the linear regression.

117  
118  
119  
120  
121  
122  
123  
124  
125  
126  
127  
128  
129  
130  
131  
132  
133  
134  
135  
136  
137  
138  
139  
140  
141



142 **Text S1.**

143 The  $\kappa_{chem}$  of this study can be calculated by the following equation(Petters and  
144 Kreidenweis, 2007):

$$145 \kappa_{chem} = \sum_i \kappa_i \cdot \varepsilon_i \quad (S1)$$

146 where  $\kappa_i$  and  $\varepsilon_i$  denote the hygroscopicity parameter  $\kappa$  and the volume fraction of  
147 chemical component  $i$  in the aerosol. Based on Eq.(S6) and Supplementary Table S5,  
148  $\kappa_{chem}$  can be expressed as follows:

$$149 \kappa_{chem} = \kappa_{AN}\varepsilon_{AN} + \kappa_{AS}\varepsilon_{AS} + \kappa_{ABS}\varepsilon_{ABS} + \kappa_{AC}\varepsilon_{AC} + \kappa_{BC}\varepsilon_{BC} + \kappa_{OA}\varepsilon_{OA} \quad (S2)$$

150 Where,  $\kappa_{BC}$  is the  $\kappa$  of the black carbon aerosol (BC), which is assumed to be zero  
151 because BC is hydrophobic;  $\kappa_{OA}$  and  $\varepsilon_{OA}$  represent the  $\kappa$  and volume fraction of the total  
152 organic matter. The total aerosol volume concentration used to calculate the volume  
153 fraction was calculated by summing the volume concentrations of all chemical species  
154 (AN, AS, ABS, AC, BC and OA), where the volume concentration of BC was calculated  
155 by assuming a density of  $1.7 \text{ g cm}^{-3}$  (Wu et al., 2016).

156

157

158

159

160

161

162

163 **Text S2.**

164 There are some characteristics of NPF and Non-NPF events (Figure S2). When  
165 NPF events occurred, the particle number size distribution showed an obvious “banana  
166 shape”, and the nucleation-mode particles exhibited a clear growth process for several  
167 hours. In Non-NPF days, the concentration of nucleation-mode particles did not exhibit  
168 a notable peak, and the growth process of particles did not appear. The onset time of  
169 NPF events observed in this study typically occurred around 10:00, coinciding with a  
170 sudden and rapid increase in the number concentration of nucleation-mode particles  
171 ( $N_{nuc}$ ). The diurnal variation of  $N_{nuc}$  exhibited a unimodal pattern, with the peak  
172 concentration occurring around 12:00. Following the increase in  $N_{nuc}$ , the number  
173 concentration of aitken-mode particles subsequently rose, reaching a peak  
174 concentration around 15:00, with a time delay of several hours after the peak of  
175 nucleation-mode particles, mainly caused by growth progress of particles from  
176 nucleation mode to a larger particle size range.

177

178

179

180

181

182

183

184 **Text S3.**

185 The  $f(\text{RH})$  values were fitted with four frequently-used empirical equations. The  
186 comparison of the fitting results,  $R^2$  values, simulated and measured values of  $f(80\%)$   
187 for each parameterization scheme reveals that Eq. (S1) had the best fitting curve, the  
188 highest  $R^2$  value, and it also had the smallest difference between simulated and  
189 measured values of  $f(80\%)$ . Therefore, Eq. (S1) was considered to be the most suitable  
190 parameterization scheme. The fitted curves of the other three parameterization schemes  
191 are shown in Figure S3.

192  $f(\text{RH}) = a\left(1 - \frac{\text{RH}}{100}\right)^{-b\left(\frac{\text{RH}}{100}\right)}$  (S3)(Chen et al., 2014)

193  $f(\text{RH}) = a\left(1 - \frac{\text{RH}}{100}\right)^{-b}$  (S4)(Kasten, 1969)

194  $f(\text{RH}) = 1 + a\left(\frac{\text{RH}}{100}\right)^b$  (S5)(Kotchenruther and Hobbs, 1998)

195  $f(\text{RH}) = 1 + a\left(\frac{\text{RH}}{100 - \text{RH}}\right)$  (S6)(Brock et al., 2016)

196

197

198

199

200

201

202

203

204

205 **Text S4.**

206 Aerosol acidity is a crucial parameter affecting the aerosol hygroscopic growth.  
207 This is usually assessed by comparing the measured mass concentration of  $\text{NH}_4^+$  with  
208 the amount required to completely neutralize sulfate, nitrate, and chloride ions  
209 (predicted  $\text{NH}_4^+$ ), which can be obtained from the following equation (Sun et al., 2010):

210  $\text{predicted } \text{NH}_4^+ = 18 \times \left(2 \times \frac{\text{SO}_4^{2-}}{96} + \frac{\text{NO}_3^-}{62} + \frac{\text{Cl}^-}{35.5}\right)$  (S7)

211 The relationship between measured  $\text{NH}_4^+$  and predicted  $\text{NH}_4^+$  was demonstrated by  
212 Figure S4. The correlation between measured and predicted  $\text{NH}_4^+$  was very strong  
213 ( $r^2=0.94$ ), with a regression slope of 0.8, revealing that there were insufficient  
214 atmospheric  $\text{NH}_4^+$  to fully neutralise sulfate and nitrate, thereby,  $\text{PM}_1$  in Xiamen was  
215 considered to be more acidic during the observation period. Thus, the main chemical  
216 form of the sulfate aerosol was  $\text{NH}_4\text{HSO}_4$ , and the nitrate aerosol was in the form of  
217  $\text{NH}_4\text{NO}_3$ . However, the average mass concentration of chloride ions was low in Xiamen  
218 during observation period, so the mass concentration of  $\text{NH}_4\text{Cl}$  was also low, with  
219  $\text{NH}_4\text{NO}_3$ ,  $\text{NH}_4\text{HSO}_4$  and  $(\text{NH}_4)_2\text{SO}_4$  as the dominant inorganic components.

220

221 **Supplementary References**

- 222 Brock, C. A., Wagner, N. L., Anderson, B. E., Attwood, A. R., Beyersdorf, A.,  
223 Campuzano-Jost, P., Carlton, A. G., Day, D. A., Diskin, G. S., Gordon, T. D., Jimenez,  
224 J. L., Lack, D. A., Liao, J., Markovic, M. Z., Middlebrook, A. M., Ng, N. L., Perring,  
225 A. E., Richardson, M. S., Schwarz, J. P., Washenfelder, R. A., Welti, A., Xu, L., Ziemba,  
226 L. D., and Murphy, D. M.: Aerosol optical properties in the southeastern United States  
227 in summer - Part 1: Hygroscopic growth, *Atmospheric Chemistry and Physics*, 16,  
228 4987-5007, 10.5194/acp-16-4987-2016, 2016.
- 229 Chen, J., Zhao, C. S., Ma, N., and Yan, P.: Aerosol hygroscopicity parameter derived  
230 from the light scattering enhancement factor measurements in the North China Plain,  
231 *Atmospheric Chemistry and Physics*, 14, 8105-8118, 10.5194/acp-14-8105-2014, 2014.
- 232 Kasten, F.: VISIBILITY FORECAST IN PHASE OF PRE-CONDENSATION, *Tellus*,  
233 21, 630-&, 10.1111/j.2153-3490.1969.tb00469.x, 1969.
- 234 Kotchenruther, R. A., and Hobbs, P. V.: Humidification factors of aerosols from biomass  
235 burning in Brazil, *Journal of Geophysical Research-Atmospheres*, 103, 32081-32089,  
236 10.1029/98jd00340, 1998.
- 237 Li, J. W., Zhang, Z. S., Wu, Y. F., Tao, J., Xia, Y. J., Wang, C. Y., and Zhang, R. J.:  
238 Effects of chemical compositions in fine particles and their identified sources on  
239 hygroscopic growth factor during dry season in urban Guangzhou of South China,  
240 *Science of the Total Environment*, 801, 10.1016/j.scitotenv.2021.149749, 2021.
- 241 Petters, M. D., and Kreidenweis, S. M.: A single parameter representation of  
242 hygroscopic growth and cloud condensation nucleus activity, *Atmospheric Chemistry  
243 and Physics*, 7, 1961-1971, 10.5194/acp-7-1961-2007, 2007.
- 244 Ren, R. M., Li, Z. Q., Yan, P., Wang, Y. Y., Wu, H., Cribb, M., Wang, W., Jin, X. A., Li,  
245 Y. A., and Zhang, D. M.: Measurement report: The effect of aerosol chemical  
246 composition on light scattering due to the hygroscopic swelling effect, *Atmospheric  
247 Chemistry and Physics*, 21, 9977-9994, 10.5194/acp-21-9977-2021, 2021.
- 248 Sun, J. Y., Zhang, Q., Canagaratna, M. R., Zhang, Y. M., Ng, N. L., Sun, Y. L., Jayne,  
249 J. T., Zhang, X. C., Zhang, X. Y., and Worsnop, D. R.: Highly time- and size-resolved  
250 characterization of submicron aerosol particles in Beijing using an Aerodyne Aerosol  
251 Mass Spectrometer, *Atmospheric Environment*, 44, 131-140,  
252 10.1016/j.atmosenv.2009.03.020, 2010.
- 253 Titos, G., Lyamani, H., Cazorla, A., Sorribas, M., Foyo-Moreno, I., Wiedensohler, A.,  
254 and Alados-Arboledas, L.: Study of the relative humidity dependence of aerosol light-  
255 scattering in southern Spain, *Tellus Series B-Chemical and Physical Meteorology*, 66,  
256 10.3402/tellusb.v66.24536, 2014.
- 257 Wu, Y. F., Wang, X. J., Yan, P., Zhang, L. M., Tao, J., Liu, X. Y., Tian, P., Han, Z. W.,  
258 and Zhang, R. J.: Investigation of hygroscopic growth effect on aerosol scattering  
259 coefficient at a rural site in the southern North China Plain, *Science of the Total  
260 Environment*, 599, 76-84, 10.1016/j.scitotenv.2017.04.194, 2017.
- 261 Wu, Z. J., Zheng, J., Shang, D. J., Du, Z. F., Wu, Y. S., Zeng, L. M., Wiedensohler, A.,  
262 and Hu, M.: Particle hygroscopicity and its link to chemical composition in the urban

263 atmosphere of Beijing, China, during summertime, *Atmospheric Chemistry and*  
264 *Physics*, 16, 1123-1138, 10.5194/acp-16-1123-2016, 2016.

265 Zhang, L., Sun, J. Y., Shen, X. J., Zhang, Y. M., Che, H., Ma, Q. L., Zhang, Y. W., Zhang,  
266 X. Y., and Ogren, J. A.: Observations of relative humidity effects on aerosol light  
267 scattering in the Yangtze River Delta of China, *Atmospheric Chemistry and Physics*, 15,  
268 8439-8454, 10.5194/acp-15-8439-2015, 2015.

269 Zhao, P. S., Ding, J., Du, X., and Su, J.: High time-resolution measurement of light  
270 scattering hygroscopic growth factor in Beijing: A novel method for high relative  
271 humidity conditions, *Atmospheric Environment*, 215, 10.1016/j.atmosenv.2019.116912,  
272 2019.

273 Zieger, P., Fierz-Schmidhauser, R., Gysel, M., Strom, J., Henne, S., Yttri, K. E.,  
274 Baltensperger, U., and Weingartner, E.: Effects of relative humidity on aerosol light  
275 scattering in the Arctic, *Atmospheric Chemistry and Physics*, 10, 3875-3890,  
276 10.5194/acp-10-3875-2010, 2010.

277 Zieger, P., Fierz-Schmidhauser, R., Weingartner, E., and Baltensperger, U.: Effects of  
278 relative humidity on aerosol light scattering: results from different European sites,  
279 *Atmospheric Chemistry and Physics*, 13, 10609-10631, 10.5194/acp-13-10609-2013,  
280 2013.

281
